# Supplementary material for: COVID-19 vaccine effectiveness against severe disease from SARS-CoV-2 Omicron BA.1 and BA.2 subvariants – surveillance results from southern Sweden, December 2021 to March 2022
Source: PubMed Central journal article supplement (PMC9074397; doi:10.2807/1560-7917.es.2022.27.18.2200322), 2022-05-05
Supplement: 22-00322_BJORK_Supplement.pdf [file 22-00322_BJORK_Supplement.pdf]

## Supplementary Material

COVID-19 vaccine effectiveness against severe disease from the Omicron BA.1 and BA.2 subvariants – surveillance results from southern Sweden, December 2021 to March 2022

Jonas Björk<sup>1,2</sup>, Carl Bonander<sup>3</sup>, Mahnaz Moghaddassi<sup>4</sup>, Magnus Rasmussen<sup>5</sup>, Ulf Malmqvist<sup>2</sup>, Malin Inghammar<sup>5</sup>, Fredrik Kahn<sup>5</sup>

<sup>1</sup>Clinical Studies Sweden, Forum South, Skåne University Hospital, Lund, Sweden

<sup>2</sup>Division of Occupational and Environmental Medicine, Lund University, Lund, Sweden

<sup>3</sup>School of Public Health and Community Medicine, Institute of Medicine, University of Gothenburg, Sweden

<sup>4</sup>Social Medicine and Global Health, Department of Clinical Sciences Malmö, Lund University, Malmö, Sweden

<sup>5</sup>Department of Clinical Sciences Lund, Section for Infection Medicine, Skåne University Hospital, Lund University, Lund, Sweden

### **Content**

Supplementary Table S1

Supplementary Table S2

Supplementary Table S3

This supplementary material is hosted by Eurosurveillance as supporting information alongside the article *COVID-19 vaccine effectiveness against severe disease from the Omicron BA.1 and BA.2 subvariants – surveillance results from southern Sweden, December 2021 to March 2022*, on behalf of the authors, who remain responsible for the accuracy and appropriateness of the content. The same standards for ethics, copyright, attributions and permissions as for the article apply. Supplements are not edited by Eurosurveillance and the journal is not responsible for the maintenance of any links or email addresses provided therein.

**Supplementary Table S1.** Routine sequencing of samples of infected cases, Scania, Sweden, 2021 w52 – 2022 w11 (n = 2,999).

| Year         | 2021 | 2022 |     |     |     |     |     |     |     |     |     |     |
|--------------|------|------|-----|-----|-----|-----|-----|-----|-----|-----|-----|-----|
| Week         | 52   | 1    | 2   | 3   | 4   | 5   | 6   | 7   | 8   | 9   | 10  | 11  |
| Total        | 289  | 325  | 281 | 340 | 288 | 314 | 314 | 222 | 222 | 123 | 124 | 157 |
| Omicron BA.1 | 162  | 206  | 136 | 153 | 72  | 65  | 40  | 32  | 77  | 6   | 6   | 6   |
| Omicron BA.2 | 29   | 61   | 124 | 179 | 214 | 244 | 273 | 190 | 144 | 117 | 118 | 151 |
| Delta        | 98   | 58   | 21  | 8   | 2   | 5   | 1   | 0   | 1   | 0   | 0   | 0   |

**Supplementary Table S2.** Classification of comorbidities.

| <b>Disease group</b>                                                                                                                                                                                                                                                   | <b>ICD-10 codes (incl KVÅ-codes<sup>a</sup>)</b>                                                      |
|------------------------------------------------------------------------------------------------------------------------------------------------------------------------------------------------------------------------------------------------------------------------|-------------------------------------------------------------------------------------------------------|
| Cardiovascular diseases                                                                                                                                                                                                                                                | I10-I15, I20-I25, I42-I43<br>I50, I60-I69<br>J81                                                      |
| Diabetes or obesity                                                                                                                                                                                                                                                    | E10, E11, E66                                                                                         |
| Kidney or liver diseases                                                                                                                                                                                                                                               | K70.X, K74.3-K74.6, K75.4,<br>K76.0<br>N18.5, N18.9<br>DR016, DR024                                   |
| Respiratory diseases                                                                                                                                                                                                                                                   | A15-A19<br>E84<br>I26, I27<br>J42, J43, J44, J45, J47, J84<br>J96, J98.2, J98.3                       |
| Neurological diseases (including dementia)                                                                                                                                                                                                                             | G00-G99<br>F00-F03                                                                                    |
| Cancer or immunosuppressed state (including organ transplantation)                                                                                                                                                                                                     | C00-C99<br>KAS, FQA, FQB, JJC, GDG, JLE<br>DR046, DR047, DR048<br>D80.0-D80.1<br>D80.5, D81, D82, D83 |
| Other conditions and diseases <ul style="list-style-type: none"> <li>• HIV</li> <li>• Thalassemia</li> <li>• Sickle cell</li> <li>• Mood disorders</li> <li>• Schizophrenia spectrum disorders</li> <li>• Substance use disorders</li> <li>• Downs syndrome</li> </ul> | B20-B24<br>D56, D57<br>F10-F19, F30-F39, F20-F29<br>Q90                                               |

<sup>a</sup>Swedish classification of certain interventions during health care visits

**Supplementary Table S3.** Vaccine effectiveness after at least three or two doses against severe COVID-19 in each follow-up period, Scania, Sweden, 2021 w52 – 2022 w11 (n = 593 cases; n = 5,930 controls).

|                             | Follow up period                 |                          |                            |
|-----------------------------|----------------------------------|--------------------------|----------------------------|
|                             | Omicron BA.1<br>2021 w52-2022 w1 | Transition<br>2022 w2-3  | Omicron BA.2<br>2022 w4-11 |
|                             | VE (95% CI) <sup>a</sup>         | VE (95% CI) <sup>a</sup> | VE (95% CI) <sup>a</sup>   |
| <i>At least three doses</i> |                                  |                          |                            |
| All                         | 94 (84 – 98)                     | 90 (82 – 95)             | 82 (64 – 91)               |
| Age                         |                                  |                          |                            |
| < 65 years                  | 92 (73 – 98)                     | 74 (16 – 92)             | 76 (32 – 91)               |
| ≥ 65 years                  | 94 (76 – 98)                     | 92 (83 – 97)             | 82 (56 – 93)               |
| Sex                         |                                  |                          |                            |
| Females                     | 92 (74 – 97)                     | 93 (81 – 98)             | 78 (35 – 93)               |
| Males                       | 96 (79 – 100)                    | 89 (74 – 96)             | 84 (62 – 93)               |
| Comorbidities               |                                  |                          |                            |
| None                        | 99 (53 – 100)                    | 96 (81 – 100)            | 77 (27 – 92)               |
| ≥ 1                         | 90 (44 – 98)                     | 84 (54 – 95)             | 85 (48 – 96)               |
| <i>Two doses</i>            |                                  |                          |                            |
| All                         | 90 (78 – 95)                     | 70 (42 – 84)             | 54 (13 – 75)               |
| Age                         |                                  |                          |                            |
| < 65 years                  | 93 (81 – 98)                     | 78 (35 – 93)             | 59 (4 – 83)                |
| ≥ 65 years                  | 84 (37 – 96)                     | 55 (0 – 81)              | 43 (0 – 79)                |
| Sex                         |                                  |                          |                            |
| Females                     | 88 (65 – 96)                     | 73 (37 – 88)             | 53 (0 – 82)                |
| Males                       | 92 (73 – 98)                     | 67 (14 – 87)             | 54 (0 – 80)                |
| Comorbidities               |                                  |                          |                            |
| None                        | 96 (66 – 100)                    | 79 (32 – 94)             | 61 (2 – 85)                |
| ≥ 1                         | 77 (0 – 95)                      | 58 (0 – 86)              | 46 (0 – 86)                |

<sup>a</sup>Vaccine effectiveness (95% confidence interval). Estimates were obtained from conditional logistic regression for age and sex matched case and controls (1:10), and with adjustment for comorbidities (0, 1, ≥2) and infection at least 90 days prior the case date. Results are presented overall and stratified by age, sex and comorbidities.
